# Supplementary material for: Cuticular Wax Modification by Epichloë Endophyte in Achnatherum inebrians under Different Soil Moisture Availability
Source: MDPI journal article supplement (doi:10.3390/jof8070725), 2022-07-12
Supplement: s1 [file s1]

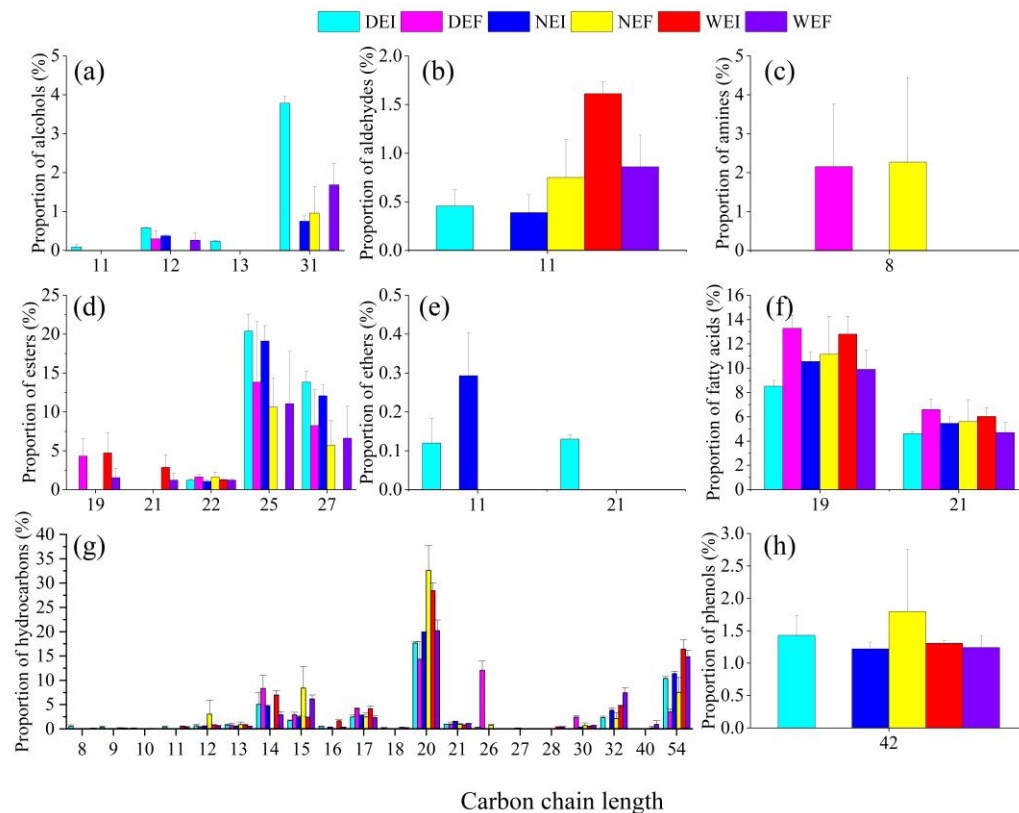

**Figure S1.** The carbon chain length distribution detected in the cuticular wax of *Achnatherum inebrians* under the status of *Epichloë gansuensis* endophyte and different soil moisture content: alcohols (a), aldehydes (b), amines (c), esters (d), ethers (e), fatty acids (f), hydrocarbons (g) and phenols (h). Values are mean, with standard error bars (n=3, D: drought, N: normal, W: well-watered, EI: endophyte-infected and EF: endophyte-free).
